# Supplementary material
Source: publisher figshare collection journal article supplement (https://geolsoc.figshare.com/ndownloader/files/24737233)
Supplement: Supplementary file 1 [file 24737233]

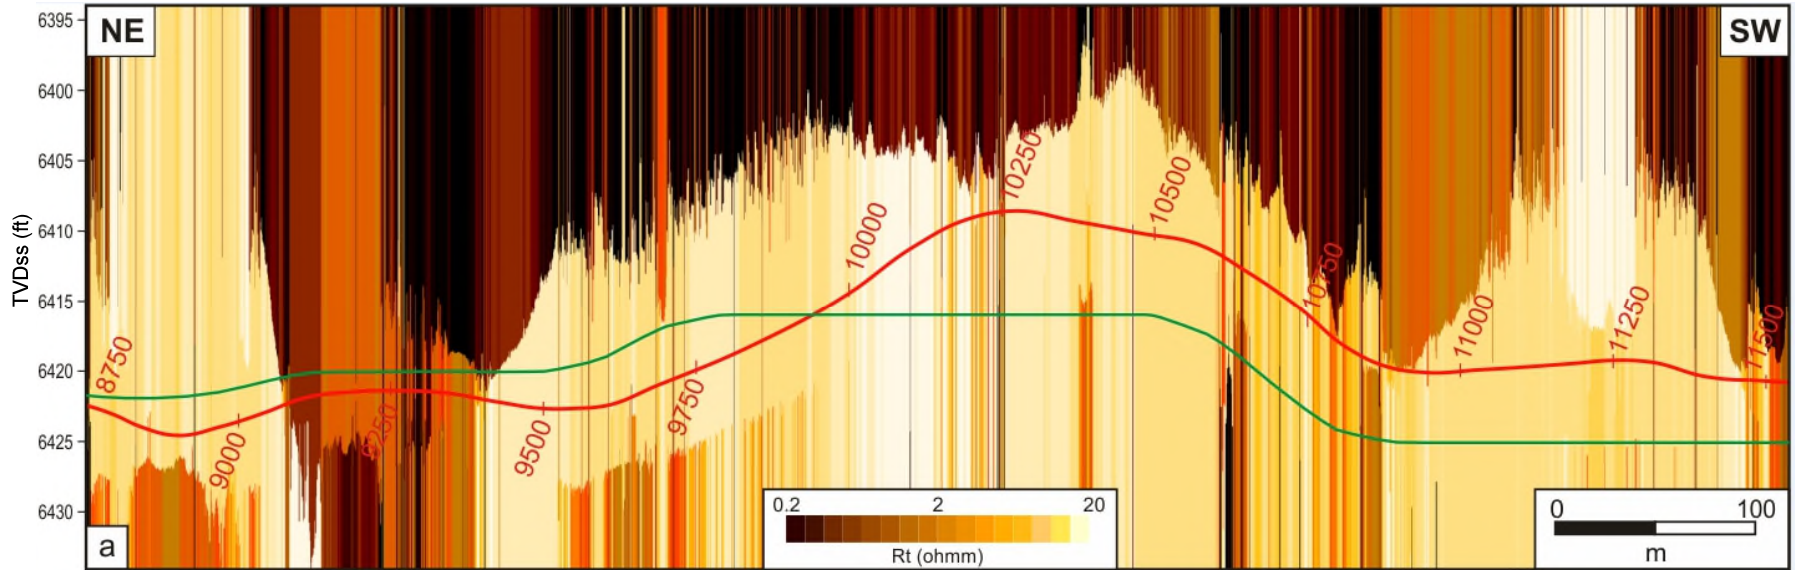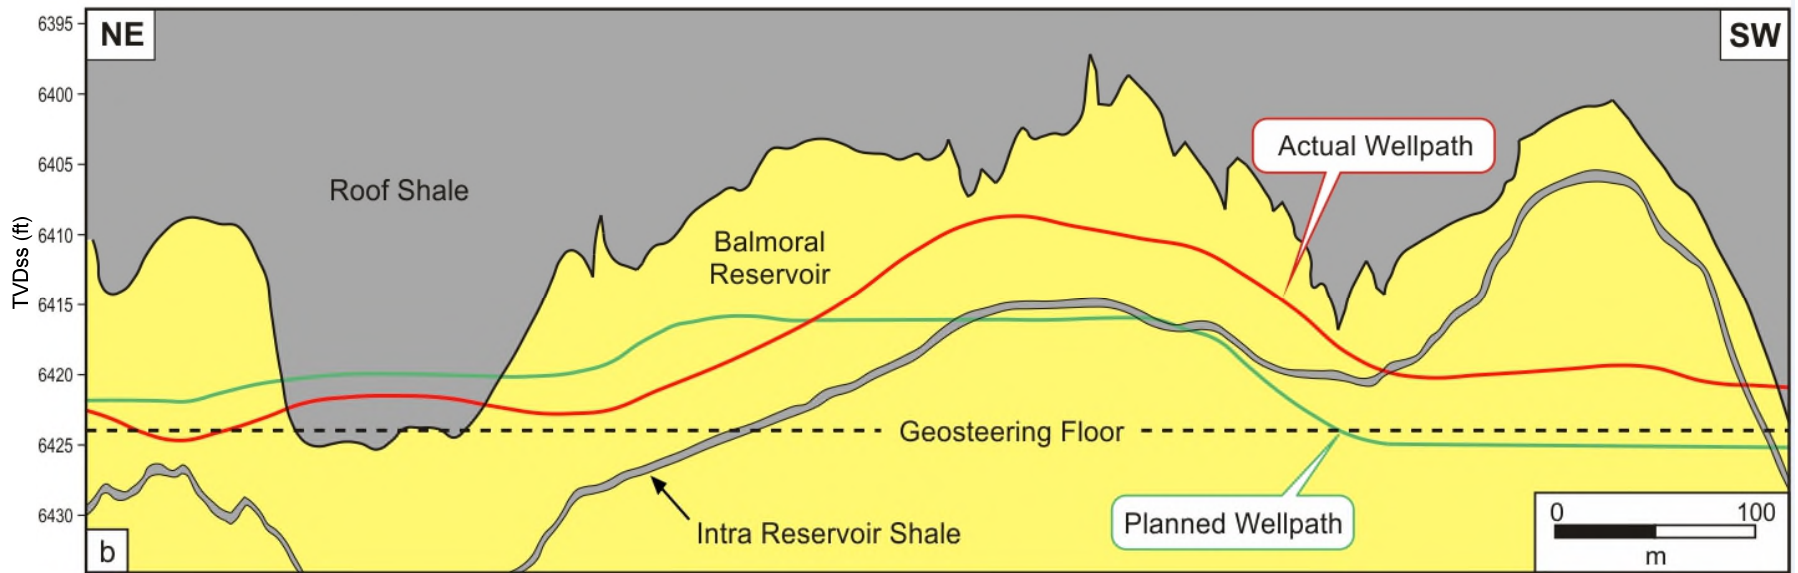

**Supplementary material 5.** Active geosteering of development wells was facilitated by integration of azimuthal resistivity images with other real-time datasets. (a) An azimuthal resistivity log image from a Donan redevelopment phase I production well. Measured depth - ft. (b) Geological interpretation of the image (after [Ings et al. 2015](#)).
